1 Alignment-free identification of COI DNA barcode data with the Python package Alfie

2

3 Cameron M. Nugent<sup>1,2,\*</sup>, Sarah J. Adamowicz<sup>1</sup>

4

5 <sup>1</sup>Department of Integrative Biology, University of Guelph. Guelph, Ontario, Canada

6 <sup>2</sup> Biodiversity Institute of Ontario, University of Guelph. Guelph, Ontario, Canada

7 \*Corresponding author: [nugentc@uoguelph.ca](mailto:nugentc@uoguelph.ca)

8

## 9 **Abstract**

10

11 Characterization of biodiversity from environmental DNA samples and bulk metabarcoding data  
12 is hampered by off-target sequences that can confound conclusions about a taxonomic group of  
13 interest. Existing methods for isolation of target sequences rely on alignment to existing  
14 reference barcodes, but this can bias results against novel genetic variants. Effectively parsing  
15 targeted DNA barcode data from off-target noise improves the quality of biodiversity estimates  
16 and biological conclusions by limiting subsequent analyses to a relevant subset of available data.  
17 Here, we present Alfie, a Python package for the alignment-free classification of cytochrome c  
18 oxidase subunit I (COI) DNA barcode sequences to taxonomic kingdoms. The package  
19 determines *k*-mer frequencies of DNA sequences, and the frequencies serve as input for a neural  
20 network classifier that was trained and tested using ~58,000 publicly available COI sequences.  
21 The classifier was designed and optimized through a series of tests that allowed for the optimal  
22 set of DNA *k*-mer features and optimal machine learning algorithm to be selected. The neural  
23 network classifier rapidly assigns COI sequences to kingdoms with greater than 99% accuracy  
24 and is shown to generalize effectively and make accurate predictions about data from previously  
25 unseen taxonomic classes. The package contains an application programming interface that  
26 allows the Alfie package's functionality to be extended to different DNA sequence classification  
27 tasks to suit a user's need, including classification of different genes and barcodes, and  
28 classification to different taxonomic levels. Alfie is free and publicly available through GitHub  
29 (<https://github.com/CNuge/alfie>) and the Python package index (<https://pypi.org/project/alfie/>).

30

31 **Keywords:** eDNA, environmental DNA, metabarcoding, COI, machine learning, neural  
32 network, alignment-free, classification

## 33 Introduction

34

35 Biodiversity is declining across the globe. Millions of species face the threat of extinction, and  
36 ecosystems are being irreversibly altered due to loss of biomass and changes in species  
37 composition (Barnosky *et al.* 2011; Ceballos *et al.* 2015). To maintain the health of ecosystems  
38 and curb biodiversity loss, informed conservation and management practices are required.  
39 Achievement of conservation goals is limited by a lack of fundamental information about species  
40 composition for many of the world's ecosystems. It is therefore imperative that technological  
41 solutions are developed to enable the accurate and efficient characterization of the world's  
42 biodiversity, so that existing species can be catalogued, and informed conservation strategies can  
43 be developed to protect the planet's ecosystems.

44 The field of DNA barcoding offers a technological solution to the problem of  
45 taxonomically classifying organismal specimens (Hebert *et al.* 2003). Instead of relying on  
46 laborious and error-prone phenotypic classifications, sequence diversity within standardized gene  
47 regions is used to enable both specimen identification and species discovery (Hebert *et al.* 2003;  
48 Ratnasingham & Hebert 2007; Hubert & Hanner 2015). The field has advanced from the  
49 barcoding of single specimens to the bulk analysis of samples, known as metabarcoding  
50 (Hajibabaei *et al.* 2011, 2016; Taberlet *et al.* 2012; Cristescu 2014), as well as multi-marker  
51 (Stefanni *et al.* 2018) and metagenomics approaches (Cuvelier *et al.* 2010). These methods have  
52 been applied in environmental biomonitoring, where multiple species are identified at once  
53 through the collection of environmental DNA (eDNA) (Taberlet *et al.* 2012). Despite the  
54 widespread adoption of these techniques, a fundamental problem persists: the accurate and  
55 repeatable characterization of biodiversity from eDNA and bulk-sample metabarcoding data is  
56 difficult, and conclusions drawn from analyses are strongly affected by methodological decisions  
57 (Clare *et al.* 2016; Braukmann *et al.* 2019).

58 Environmental biomonitoring often aims to answer ecological questions through the  
59 targeted examination of a taxonomic group of interest. DNA barcodes from a group of focus are  
60 targeted using group-specific PCR primers for one or more selected marker genes in the PCR  
61 amplification step that precedes high-throughput sequencing (Braukmann *et al.* 2019; Wilson *et al.*  
62 *et al.* 2019). Some commonly used primers are overly general, which results in the amplification of  
63 non-target barcodes, introducing noise into data and confounding efforts to characterize true  
64 species composition for targeted taxonomic groups (Brandon-Mong *et al.* 2015; Zinger *et al.*  
65 2019). Additionally, intra-group PCR bias can further confound the characterization of  
66 biodiversity. The over representation of certain taxa within the target group can result in other  
67 taxa being overlooked due to poorer amplification and sequencing coverage (Elbrecht & Leese  
68 2015).

69 Shotgun sequencing of eDNA overcomes the primer issues of eDNA metabarcoding but  
70 also produces substantial sequencing noise and sequences from non-standardized genomic  
71 regions (Stat *et al.* 2017; Wilson *et al.* 2019). A trade off therefore exists; shotgun sequencing  
72 overcomes the amplification bias associated with PCR, but the majority of shotgun sequencing  
73 outputs cannot be assigned even high-level taxonomic classifications with confidence (Stat *et al.*  
74 2017; Singer *et al.* 2020). Despite present technical limitations, eDNA shotgun sequencing and  
75 other next-generation biomonitoring techniques are seeing increased adoption thanks to their  
76 potential to characterize biodiversity more broadly (Makiola *et al.* 2020). Within this next  
77 generation of biomonitoring methodologies, tools leveraging machine-learning algorithms and

78 available data will be essential to overcoming the limitations associated with existing methods  
79 (Cordier *et al.* 2019).

80 The detection of the presence and abundance of species from a specific group is  
81 hampered by off-target barcodes that are amplified and sequenced in metabarcode analysis. The  
82 failure to parse target sequences effectively from off-target noise can result in erroneously  
83 inflated estimates of biodiversity (Bengtsson *et al.* 2011). Currently, the characterization of  
84 biodiversity via metabarcode samples is primarily dependent on the alignment of sequences  
85 against a pre-defined set of reference barcodes or comparison of sequences against taxon-specific  
86 models (Altschul *et al.* 1990; Wang *et al.* 2007; Bengtsson *et al.* 2011; Bengtsson-Palme *et al.*  
87 2015). These processes limit comparison to previously characterized barcode sequences,  
88 potentially exhibiting bias against novel genetic variants. The methods are also computationally  
89 intensive, often requiring each novel variant to be compared to each reference entry. These  
90 methods would therefore be improved through the incorporation of an alignment-free pre-  
91 filtering step that allowed for target sequences to be rapidly and accurately isolated from the  
92 whole set of metabarcode output sequences using algorithms with lower computational  
93 complexity (Zielezinski *et al.* 2017). This would reduce the number of spurious barcodes and  
94 improve inflated biodiversity estimates. Additionally, the speed of analyses would be improved  
95 by limiting subsequent alignment-based analyses to the isolated target sequences.

96 Alignment-free methods have been widely applied in biological sequence annotation and  
97 classification problems (Zielezinski *et al.* 2017). Alignment-free comparison is defined as any  
98 method of quantifying sequence similarity that does not produce an alignment; these methods are  
99 generally less computationally intensive and can be as effective as conventional alignments  
100 (Bonham-Carter *et al.* 2014; Zielezinski *et al.* 2017). To compare sequences without alignment,  
101 features must be extracted from sequences in order to characterize their structure. One common  
102 set of alignment-free features is  $k$ -mer counts, where the number of occurrences of fixed length  
103 DNA words of length  $k$  are quantified (Crusoe *et al.* 2015). These features can be used as inputs  
104 for machine learning models trained to predict classifications such as the taxonomic designation  
105 associated with sequences (Solis-Reyes *et al.* 2018). Machine learning models that operate on  $k$ -  
106 mer input features have previously been applied in DNA barcode sequence classification and  
107 other predictive tasks (Kuksa & Pavlovic 2009; Langenkämper *et al.* 2014; Ainsworth *et al.*  
108 2016; Cordier *et al.* 2017). The application of these tools is often limited to specific taxonomic  
109 classification tasks (Kuksa & Pavlovic 2009), or they rely on user-provided sets of sequence data  
110 for model training (Langenkämper *et al.* 2014).

111 The goals of this study were to: (1) develop a high-level alignment-free taxonomic  
112 classification tool for metabarcoding and environmental DNA marker gene data. This tool was  
113 initially designed for the kingdom-level classification of barcode sequences from the most  
114 common animal barcode, a region of the mitochondrial cytochrome c oxidase subunit I (COI)  
115 gene. (2) To achieve this, we explore different feature sets ( $k$ -mer sizes) and machine learning  
116 algorithms to determine the optimal machine learning architecture for alignment-free barcode  
117 classification. (3) To make the tool accessible to other researchers, we develop a Python package  
118 and command line interface to allow the alignment-free classifier to be easily deployed in future  
119 research applications. (4) Within the Python package, we also develop an application  
120 programming interface (API) to facilitate the construction of customized alignment-free  
121 classifiers for any barcode, gene, or taxonomic group of interest. Addressing these goals led to  
122 the creation of the Python package Alfie, which contains a kingdom-level alignment-free DNA  
123 barcode classifier, as well as an API to aid users in custom alignment-free classifier construction.

124 Alfie is free and publicly available through GitHub (<https://github.com/CNuge/alfie>) and the  
125 Python package index (<https://pypi.org/project/alfie/>).

126

## 127 **Methods**

128

### 129 **Data acquisition**

130

131 The Barcode Of Life Data system (BOLD) (Ratnasingham & Hebert 2007) was queried to obtain  
132 all publicly available sequences for the DNA barcode: cytochrome c oxidase subunit I (COI)  
133 (<https://github.com/CNuge/data-alfie>). Sequences were filtered to ensure a minimum length of  
134 300 base pairs (bp). The five kingdom-level classifications used by the BOLD database (Animal,  
135 Bacteria and Archaea, Fungi, Plant, Protist) were maintained and utilized as the labels in  
136 subsequent classifier development. As a result of BOLD's mandate to catalogue animal  
137 biodiversity, the database displays a significant sampling bias towards the animal kingdom. To  
138 ensure that models could be trained effectively and not be biased towards animal classification,  
139 down sampling of the animal data was performed to ensure more even representation of  
140 sequences among kingdoms. Stratified sampling of animal sequences was performed to obtain a  
141 representative subsample of 0.2% of the total set of sequences available (sequences were  
142 sampled proportionally on the taxonomic level: class; a sample size of 0.2% was chosen as this  
143 yielded a set of animal sequences roughly equal to the kingdom with the second highest number  
144 of available COI barcodes, plants) (Table 1). To train models robust to variable data quality and  
145 barcode sequence coverage, each individual barcode sequence was randomly subsampled, with a  
146 200-600 base pair subsection of the complete barcode being retained at random and subsequently  
147 utilized in model training and testing.

148 Prior to splitting the data into a train and test set, a validation set was created to provide a  
149 stringent test of the final models' ability to make external predictions. From each kingdom, a  
150 complete taxonomic class was withheld to create the validation set and simulate rare or  
151 previously unseen sequences. The class withheld from each kingdom was chosen manually, with  
152 selection being based on the distribution of barcodes across the taxonomic classes of the given  
153 kingdom. Barcode distribution was variable across kingdoms, so no suitable rule-based selection  
154 method was found; classes with intermediate levels of representation within their kingdom were  
155 selected. Classes with intermediate representation levels were chosen to provide good sample  
156 sizes for subsequent classification tests without grossly detracting from the size of available  
157 training data. For the protist kingdom, two classes were selected for inclusion in the validation  
158 set due to small intra-class barcode counts. The composition of the final validation set is  
159 described in Table 2. After the validation set was withheld, the remaining data were split into a  
160 train and test (stratified split on level: kingdom), with 80% of data comprising the training set,  
161 and the other 20% being withheld as the test set (Table 2; Supplementary File S1).

162

### 163 **Feature set evaluation – *k*-mer size**

164

165 Following the train-test split, different sets of alignment-free features were generated, and the  
166 accuracy of kingdom-level classifications by the resulting models were tested. For barcode  
167 sequences in the training set, *k*-mer frequencies were generated for values of *k* from 1 to 6.  
168 *K*-mer frequencies (count of a given *k*-mer divided by the total number of *k*-mers counted in a  
169 given barcode) were used as model inputs, so as to standardize the scale of input values and also

170 ensure the models were robust to inputs of different lengths. For each  $k$ -mer feature set, deep  
171 neural networks with five hidden neuron layers were trained and evaluated through 5-fold cross  
172 validation (neural networks implemented using the package Tensorflow Version 2.1.0, Abadi *et*  
173 *al.* 2016). The choice of deep neural network-based classifiers with five hidden neuron layers  
174 was based on exploratory data analysis and preliminary model construction that showed this  
175 architecture to produce effective classifiers. The number of neurons in the hidden layers of the  
176 neural network were adjusted according to the size of the input feature set (Table 3). The 5-fold  
177 loss and accuracy metrics for the neural networks with different  $k$ -mer inputs were compared via  
178 a one-factor analysis of variance (ANOVA) to determine if there were significant differences in  
179 classification accuracy for different feature sets ( $k$ -mer sizes) and to select an optimal value of  $k$   
180 for further model testing.

181

## 182 **Algorithm evaluation**

183

184 After selection of the optimal  $k$ -mer size, a series of different machine learning models were fit  
185 using the training set and optimized through a grid search of hyperparameters. Five classification  
186 algorithms were utilized:  $k$  nearest neighbour (KNN), support vector machine (SVM), random  
187 forest (RF), extreme gradient boosting (XGB), and deep neural network (DNN). All models were  
188 deployed using the Python programming language (Version 3.7.4). The KNN, SVM, and RF  
189 models were implemented using the package scikit-learn (Version 0.21.3, Pedregosa *et al.* 2011),  
190 the XGB model was implemented using the package XGBoost (Version 0.90, Chen & Guestrin  
191 2016), and the DNN was implemented using the package Tensorflow (Version 2.1.0, Abadi *et al.*  
192 2016). In order to select optimal hyperparameters and optimize performance, for each algorithm  
193 a grid search was performed using scikit-learn's GridSearchCV function to train a series of  
194 models on the training data set using 5-fold cross validation (Supplementary File S2). Optimal  
195 hyperparameters were selected based on the highest classification accuracy. For the DNN, a  
196 custom grid search script was used, with 5-fold cross validation and several potential values for  
197 each of the models' respective hyperparameters (Supplementary File S3).

198 Following the selection of optimal hyperparameter sets through the grid searches, a final  
199 version of each model was trained using the optimal set of hyperparameters and the complete  
200 training data set. Final trained models were then used to make predictions for the previously  
201 withheld test and validation sets (Table 1; Table 2). Predicted classifications were compared to  
202 true values to determine the model with the highest classification accuracy. A single optimal  
203 alignment-free kingdom-level classifier was selected for inclusion in the Alfie package based on  
204 the accuracy of predictions made on the test and validation data. Several secondary classifier  
205 characteristics were also considered to ensure model reusability. Specifically, the file size of the  
206 trained models and the time required to make predictions were quantified to ensure that the  
207 package's memory and time requirements were not prohibitive. The Alfie package was then  
208 constructed to allow for the model to be reused in external analyses.

209

210

## 211 **Results and Discussion**

212

### 213 **$K$ -mer size**

214

215 The cross-validation accuracy scores for the different neural networks and corresponding  $k$ -mer  
216 feature sets were compared to determine an optimal  $k$ -mer feature size. The results showed that  
217 the accuracy of models improved with the  $k$ -mer feature size, with diminishing improvements  
218 beyond  $k = 3$  (Table 3; Figure 1). A one-factor ANOVA revealed the differences to be significant  
219 ( $p < 2e-16$ , F statistic = 318.3,  $DF_{1,2} = 5, 24$ ), and a subsequent Tukey's HSD test showed the  
220 accuracy of both  $k = 1$  and  $k = 2$  to differ significantly from all larger values of  $k$  but no  
221 significant differences in the performance of pairwise comparisons between  $k$  3-6. A final  $k$   
222 value of 4 was selected for subsequent tests, due to the insignificant differences between the  
223 values of  $k = 3$  to  $k = 6$  and the conservative choice to select a  $k$ -mer size one larger than the  
224 apparent minimal effective feature set.

### 225 226 **Training and validation**

227  
228 For each of the machine learning algorithms, a grid search was used to obtain an optimal  
229 hyperparameter set (Supplementary File S3). Final models were trained using the complete  
230 training data set and then used to make predictions for the test and validation sets (Table 1; Table  
231 4). Performance on the test data (withheld barcodes from taxonomic groups otherwise  
232 represented in the training data) was strong for all models, with the lowest classification  
233 accuracy exceeding 98% (RF), and all other models exceeding 99.5% accuracy (Table 4). All  
234 models made less accurate kingdom-level predictions on the validation data (barcodes from  
235 taxonomic classes that were completely withheld during training) (Table 5). The accuracy was  
236 more variable across models as well. On the validation data, the accuracy score of the RF model  
237 was 0.861, and accuracy for the KNN model was 0.927, indicating poorer generalization for  
238 these methods to previously unseen data. Each of the DNN, SVM, and XGB models had  
239 accuracy  $>97\%$  on the validation data, and the most accurate model was the DNN (0.976).

### 240 241 **Final model**

242  
243 The DNN (operating on 4-mer input features) was selected as the final default kingdom-level  
244 classification model for the Alfie package. The DNN provided the highest accuracy on the  
245 validation data, as well as high accuracy on the test dataset. These results indicated that the  
246 model was not likely to be over fit to the training data and that it was able to generalize  
247 effectively and make predictions about data from previously unseen taxonomic classes. This  
248 generalizability of the model to rare or unseen taxa is an important feature that indicates the Alfie  
249 package can likely be used effectively in the analysis of under-studied environments where  
250 uncharacterized biodiversity is more likely to be present. The 4-mer DNN's high accuracy on the  
251 test and validation data also indicated that the features and model can effectively capture a  
252 taxonomic signal despite no alignment being performed and variable input sequence length. The  
253 model was robust to sequences of variable lengths that spanned various subsections of the COI  
254 barcode region (variable start and stop positions in the COI barcode region, as opposed to  
255 primer-standardized sub-regions). This indicates that the alignment-free classification by Alfie is  
256 an effective method for processing DNA barcoding, metabarcoding (specific subsections of the  
257 barcode region in a given study), and potentially even applied in analysis of metagenomics data  
258 (non-standardized fragments from shotgun sequencing).

259  
260

## 261 Alignment-free model framework

262  
263 The design and testing of the Alfie package presented here focuses on high-level (kingdom)  
264 classification for the most common animal barcode, COI. However, the Alfie package provides a  
265 robust framework that a user can easily apply to produce and test alignment-free classification  
266 tools for any taxonomic distinction, DNA barcode, or combination thereof (Supplementary File  
267 S4). As a kingdom-level classifier, Alfie acts as an effective data filter, allowing the barcode  
268 sequences from a kingdom of interest to be separated from the large amount of off-target noise  
269 common in metabarcode or metagenomics data. The alignment-free methods can be reapplied to  
270 further home in on taxonomic targets; for example, using publicly available data  
271 (<https://github.com/CNuge/data-alfie>) a binary classifier can be trained and subsequently  
272 deployed with Alfie to allow for any taxonomic group of interest to be separated from a complete  
273 set of COI metabarcode sequences. Using other publicly available data (i.e. Pruesse *et al.* 2007;  
274 Banchi *et al.* 2020), the same custom model construction and training tools in Alfie can be used  
275 to construct binary or multiclass alignment-free classification tools for other DNA barcodes or  
276 genes.

277 Although the Alfie package is an effective alignment-free classification framework at  
278 high taxonomic levels, traditional alignments are likely more effective for lower-level  
279 classification tasks (i.e. classification to genus or species level). The  $k$ -mer frequency method  
280 used by Alfie is not likely to be effective for resolving differences between closely related  
281 species with more subtle genetic differences than those seen at higher taxonomic levels.  
282 Similarly, for taxonomic groups with few representatives and no closely related outgroups,  
283 available training data may be scant, providing a limitation in training of DNNs or other machine  
284 learning models which rely on abundant training data. The integration of alignment-based and  
285 alignment-free methods for biological sequence classification has been shown to leverage the  
286 strengths of the individual approaches to yield an efficient and accurate classification method  
287 (Borožan *et al.* 2015).

288 A similar hybrid approach using the Alfie package for filtration of sequences and  
289 subsequent alignment of sequences for a group of interest can narrow the scope of the  
290 application of alignment methods and thereby improve both analysis speed and accuracy. The  
291 alignment-free model construction framework of Alfie can allow for multiple models to be  
292 trained with relative ease and applied in conjunction with one another to isolate barcode  
293 sequences of interest from large and messy inputs such as metagenomics data. Models could be  
294 trained and applied to: (a) separate sequences from key mitochondrial genes from other  
295 sequences, (b) assign sequences to a barcode or gene of origin, (c) conduct kingdom-level  
296 classification for different barcode genes, and (d) conduct classification at lower taxonomic  
297 levels. All this could be accomplished using the same 4-mer frequency data and would allow for  
298 messy inputs to be filtered and categorized. Processing of metagenomics data in this manner  
299 would allow subsequent alignment effort to be more strategically targeted, improving analysis  
300 speed and accuracy.

301

302

## 303 Conclusions

304

305 We have developed and tested the Python package Alfie, which extracts  $k$ -mer features and uses  
306 a neural network to make kingdom-level classifications of COI DNA barcode fragments with

307 greater than 99% accuracy. The Alfie package can therefore be used to separate barcode data for  
308 a kingdom of interest from off-target noise, narrowing the scope of subsequent analyses to only  
309 relevant data. The model is robust to full-length barcodes and short sequence fragments and is  
310 therefore an effective classifier for use in both barcode and metabarcode analyses. The Alfie  
311 package can be incorporated into broader analyses pipelines (Elbrecht *et al.* 2018; Cordier *et al.*  
312 2019) and paired with tools that conduct quality control (Callahan *et al.* 2016; Nugent *et al.*  
313 2020) and taxonomic annotation (Altschul *et al.* 1990; Wang *et al.* 2007) to characterize  
314 biodiversity from large and complex data sets. The default model of Alfie is limited to kingdom-  
315 level classification for the most common animal barcode, COI. Researchers may expand upon  
316 this narrow scope to fit custom research needs by using the training module of Alfie. This allows  
317 Alfie to be applied in different taxonomic classification tasks or for the classification of data  
318 from different DNA barcodes (where labelled training data are available). The generalized and  
319 customized nature of the Alfie package will allow for it to adapt along with the field of  
320 biodiversity genomics. As metagenomics becomes more prevalent, the Alfie package can be  
321 expanded with additional default models for tasks such as the isolation of mitochondrial DNA or  
322 sequences from specific mitochondrial genes from large, messy shotgun sequencing datasets.  
323  
324



## 325 **References**

- 326
- 327 Abadi M, Barham P, Chen J, Chen Z, Davis A, Dean J, Devin M, Ghemawat S, Irving G, Isard  
328 M, Kudlur M (2016) Tensorflow: A system for large-scale machine learning. In 12th  
329 {USENIX} Symposium on Operating Systems Design and Implementation ({OSDI} 16)  
330 265-283.
- 331
- 332 Agarap AF (2018) Deep learning using rectified linear units (relu). arXiv preprint  
333 arXiv:1803.08375.
- 334
- 335 Altschul SF, Gish W, Miller W, Myers EW, Lipman DJ (1990) Basic local alignment search tool.  
336 *Journal of Molecular Biology* 215(3):403-10 DOI: [https://doi.org/10.1016/S0022-](https://doi.org/10.1016/S0022-2836(05)80360-2)  
337 [2836\(05\)80360-2](https://doi.org/10.1016/S0022-2836(05)80360-2)
- 338
- 339 Ainsworth D, Sternberg MJ, Raczy C, Butcher SA (2017) k-SLAM: accurate and ultra-fast  
340 taxonomic classification and gene identification for large metagenomic data sets. *Nucleic*  
341 *Acids Research* 45(4):1649-56. DOI: <https://doi.org/10.1093/nar/gkw1248>
- 342
- 343 Banchi E, Ametrano CG, Greco S, Stanković D, Muggia L, Pallavicini A (2020) PLANiTS: a  
344 curated sequence reference dataset for plant ITS DNA metabarcoding. *Database*. DOI:  
345 <https://doi.org/10.1093/database/baz155>
- 346
- 347 Barnosky AD, Matzke N, Tomiya S, Wogan GO, Swartz B, Quental TB, Marshall C, McGuire  
348 JL, Lindsey EL, Maguire KC, Mersey B (2011) Has the Earth's sixth mass extinction  
349 already arrived?. *Nature*, 471(7336), 51-57. DOI: <https://doi.org/10.1038/nature09678>.
- 350
- 351 Bengtsson J, Eriksson KM, Hartmann M, Wang Z, Shenoy BD, Grelet GA, Abarenkov K, Petri  
352 A, Rosenblad MA, Nilsson RH (2011) Metaxa: a software tool for automated detection  
353 and discrimination among ribosomal small subunit (12S/16S/18S) sequences of archaea,  
354 bacteria, eukaryotes, mitochondria, and chloroplasts in metagenomes and environmental  
355 sequencing datasets. *Antonie Van Leeuwenhoek* 100(3):471. DOI:  
356 <https://doi.org/10.1007/s10482-011-9598-6>
- 357
- 358 Bengtsson-Palme J, Hartmann M, Eriksson KM, Pal C, Thorell K, Larsson DG, Nilsson RH  
359 (2015) METAXA2: improved identification and taxonomic classification of small and  
360 large subunit rRNA in metagenomic data. *Molecular Ecology Resources* (6):1403-14.  
361 DOI: <https://doi.org/10.1111/1755-0998.12399>
- 362
- 363 Bonham-Carter O, Steele J, Bastola D (2014) Alignment-free genetic sequence comparisons: a  
364 review of recent approaches by word analysis. *Briefings in Bioinformatics* 15(6):890-  
365 905. DOI: <https://doi.org/10.1093/bib/bbt052>
- 366
- 367 Borozan I, Watt S, Ferretti V (2015) Integrating alignment-based and alignment-free sequence  
368 similarity measures for biological sequence classification. *Bioinformatics* 31(9):1396-  
369 404. DOI: <https://doi.org/10.1093/bioinformatics/btv006>
- 370

- 371 Braukmann TW, Ivanova NV, Prosser SW, Elbrecht V, Steinke D, Ratnasingham S, de Waard JR,  
372 Sones JE, Zakharov EV, Hebert PD (2019) Metabarcoding a diverse arthropod mock  
373 community. *Molecular Ecology Resources* 19(3):711-27. DOI:  
374 <https://doi.org/10.1111/1755-0998.13008>  
375
- 376 Brandon-Mong GJ, Gan HM, Sing KW, Lee PS, Lim PE, Wilson JJ (2015) DNA metabarcoding  
377 of insects and allies: an evaluation of primers and pipelines. *Bulletin of Entomological*  
378 *Research* 105(6):717-27. DOI: <https://doi.org/10.1017/S0007485315000681>  
379
- 380 Callahan BJ, McMurdie PJ, Rosen MJ, Han AW, Johnson AJA, Holmes SP (2016). DADA2:  
381 high-resolution sample inference from Illumina amplicon data. *Nature Methods*, 13(7),  
382 581. DOI: <https://doi.org/10.1038/nmeth.3869>  
383
- 384 Ceballos G, Ehrlich, PR, Barnosky AD, García A, Pringle RM, Palmer TM (2015) Accelerated  
385 modern human-induced species losses: Entering the sixth mass extinction. *Science*  
386 *advances*, 1(5), e1400253. DOI: <https://doi.org/10.1126/sciadv.1400253>  
387
- 388 Chen T, Guestrin C (2016) Xgboost: A scalable tree boosting system. In *Proceedings of the 22nd*  
389 *acm sigkdd international conference on knowledge discovery and data mining 2016* pp.  
390 785-794. DOI: <https://doi.org/10.1145/2939672.2939785>  
391
- 392 Cordier T, Esling P, Lejzerowicz F, Visco J, Ouadahi A, Martins C, Cedhagen T, Pawlowski J  
393 (2017) Predicting the ecological quality status of marine environments from eDNA  
394 metabarcoding data using supervised machine learning. *Environmental Science &*  
395 *Technology* 51(16):9118-26. DOI: <https://doi.org/10.1021/acs.est.7b01518>  
396
- 397 Cordier T, Lanzén A, Apothéloz-Perret-Gentil L, Stoeck T, Pawlowski J (2019) Embracing  
398 environmental genomics and machine learning for routine biomonitoring. *Trends in*  
399 *Microbiology* 27(5):387-97. DOI: <https://doi.org/10.1016/j.tim.2018.10.012>  
400
- 401 Clare EL, Chain FJ, Littlefair JE, Cristescu ME (2016) The effects of parameter choice on  
402 defining molecular operational taxonomic units and resulting ecological analyses of  
403 metabarcoding data. *Genome* 59(11):981-90. DOI: <https://doi.org/10.1139/gen-2015-0184>  
404  
405
- 406 Cristescu ME (2014) From barcoding single individuals to metabarcoding biological  
407 communities: towards an integrative approach to the study of global biodiversity. *Trends*  
408 *in Ecology & Evolution* 29(10):566-71. DOI: <https://doi.org/10.1016/j.tree.2014.08.001>  
409
- 410 Crusoe MR, Alameldin HF, Awad S, Boucher E, Caldwell A, Cartwright R, Charbonneau A,  
411 Constantinides B, Edverson G, Fay S, Fenton J (2015) The khmer software package:  
412 enabling efficient nucleotide sequence analysis. *F1000Research* 4. DOI:  
413 <https://doi.org/10.12688/f1000research.6924.1>  
414
- 415 Cuvelier ML, Allen AE, Monier A, McCrow JP, Messié M, Tringe SG, Woyke T, Welsh RM,  
416 Ishoey T, Lee JH, Binder BJ (2010) Targeted metagenomics and ecology of globally

- 417 important uncultured eukaryotic phytoplankton. *Proceedings of the National Academy of*  
418 *Sciences* 107(33):14679-84. DOI: <https://doi.org/10.1073/pnas.1001665107>  
419
- 420 Elbrecht V, Leese F (2015) Can DNA-based ecosystem assessments quantify species abundance?  
421 Testing primer bias and biomass—sequence relationships with an innovative  
422 metabarcoding protocol. *PLoS ONE* 10(7). DOI:  
423 <https://doi.org/10.1371/journal.pone.0130324>  
424
- 425 Elbrecht V, Vamos EE, Steinke D, Leese F (2018) Estimating intraspecific genetic diversity from  
426 community DNA Metabarcoding Data. *PeerJ*, 6, e4644. DOI:  
427 <https://doi.org/10.7717/peerj.4644>  
428
- 429 Hajibabaei M, Shokralla S, Zhou X, Singer GA, Baird DJ (2011) Environmental barcoding: a  
430 next-generation sequencing approach for biomonitoring applications using river benthos.  
431 *PLoS ONE* 6(4). DOI: <https://doi.org/10.1371/journal.pone.0017497>  
432
- 433 Hajibabaei M, Baird DJ, Fahner NA, Beiko R, Golding GB (2016) A new way to contemplate  
434 Darwin's tangled bank: how DNA barcodes are reconnecting biodiversity science and  
435 biomonitoring. *Philosophical Transactions of the Royal Society B: Biological Sciences*  
436 371(1702):20150330. DOI: <https://doi.org/10.1098/rstb.2015.0330>  
437
- 438 Hebert PDN, Cywinska A, Ball SL, Dewaard JR (2003) Biological identifications through DNA  
439 barcodes. *Proceedings of the Royal Society of London. Series B: Biological Sciences*  
440 270(1512):313-21. DOI: <https://doi.org/10.1098/rspb.2002.2218>  
441
- 442 Hubert N, Hanner R (2015) DNA barcoding, species delineation and taxonomy: a historical  
443 perspective. *DNA Barcodes* 3(1):44-58. DOI: <https://doi.org/10.1515/dna-2015-0006>  
444
- 445 Kingma DP, Ba J (2014) Adam: A method for stochastic optimization. arXiv preprint  
446 arXiv:1412.6980.  
447
- 448 Kuksa P, Pavlovic V (2009) Efficient alignment-free DNA barcode analytics. *BMC*  
449 *Bioinformatics* 10(S14):S9. DOI: <https://doi.org/10.1186/1471-2105-10-S14-S9>  
450
- 451 Langenkämper D, Goesmann A, Nattkemper TW (2014) Ake—the accelerated *k*-mer exploration  
452 web-tool for rapid taxonomic classification and visualization. *BMC Bioinformatics*  
453 15(1):384. DOI: <https://doi.org/10.1186/s12859-014-0384-0>  
454
- 455 Makiola A, Compson ZG, Baird DJ, Barnes MA, Boerlijst SP, Bouchez A, Brennan G, Bush A,  
456 Canard E, Cordier T, Creer S (2020) Key questions for next-generation biomonitoring.  
457 *Frontiers in Environmental Science*. DOI: <https://doi.org/10.3389/fenvs.2019.00197>  
458
- 459 Nugent CM, Elliott TA, Ratnasingham S, Adamowicz SJ (2020) Coil: an R package for  
460 cytochrome C oxidase I (COI) DNA barcode data cleaning, translation, and error  
461 evaluation. *Genome*. 63(6):291-305. DOI: <https://doi.org/10.1139/gen-2019-0206>  
462

- 463 Pedregosa F, Varoquaux G, Gramfort A, Michel V, Thirion B, Grisel O, Blondel M, Prettenhofer  
464 P, Weiss R, Dubourg V, Vanderplas J (2011) Scikit-learn: Machine learning in Python.  
465 Journal of Machine Learning Research 12(Oct):2825-30.  
466
- 467 Pruesse E, Quast C, Knittel K, Fuchs BM, Ludwig W, Peplies J, Glöckner FO (2007) SILVA: a  
468 comprehensive online resource for quality checked and aligned ribosomal RNA sequence  
469 data compatible with ARB. Nucleic Acids Research 35(21):7188-96. DOI:  
470 <https://doi.org/10.1093/nar/gkm864>  
471
- 472 Ratnasingham S, Hebert PDN (2007) BOLD: The Barcode of Life Data System ([http://www.  
473 barcodinglife.org](http://www.barcodinglife.org)). Molecular Ecology Notes. 7(3):355-64. DOI:  
474 <https://doi.org/10.1111/j.1471-8286.2007.01678.x>  
475
- 476 Singer GA, Shekarriz S, McCarthy A, Fahner N, Hajibabaei M (2020) The utility of a  
477 metagenomics approach for marine biomonitoring. bioRxiv. DOI:  
478 <https://doi.org/10.1101/2020.03.16.993667>  
479
- 480 Solis-Reyes S, Avino M, Poon A, Kari L (2018) An open-source *k*-mer based machine learning  
481 tool for fast and accurate subtyping of HIV-1 genomes. PLoS ONE 13(11). DOI:  
482 <https://doi.org/10.1371/journal.pone.0206409>  
483  
484
- 485 Stat M, Huggett MJ, Bernasconi R, DiBattista JD, Berry TE, Newman SJ, Harvey ES, Bunce M  
486 (2017) Ecosystem biomonitoring with eDNA: metabarcoding across the tree of life in a  
487 tropical marine environment. Scientific Reports 7(1):1-1. DOI:  
488 <https://doi.org/10.1038/s41598-017-12501-5>  
489
- 490 Stefanni S, Stanković D, Borme D, de Olazabal A, Juretić T, Pallavicini A, Tirelli V (2018)  
491 Multi-marker metabarcoding approach to study mesozooplankton at basin scale.  
492 Scientific Reports 8(1):1-3. DOI: <https://doi.org/10.1038/s41598-018-30157-7>  
493
- 494 Taberlet P, Coissac E, Hajibabaei M, Rieseberg LH (2012) Environmental DNA. Molecular  
495 Ecology 21(8):1789-93. DOI: <https://doi.org/10.1111/j.1365-294X.2012.05542.x>  
496
- 497 Wang Q, Garrity GM, Tiedje JM, Cole JR (2007) Naive Bayesian classifier for rapid assignment  
498 of rRNA sequences into the new bacterial taxonomy. Applied and Environmental  
499 Microbiology 73(16):5261-7. DOI: <https://doi.org/10.1128/AEM.00062-07>  
500
- 501 Wilson JJ, Brandon-Mong GJ, Gan HM, Sing KW (2019) High-throughput terrestrial  
502 biodiversity assessments: mitochondrial metabarcoding, metagenomics or  
503 metatranscriptomics?. Mitochondrial DNA Part A 30(1):60-7. DOI:  
504 <https://doi.org/10.1080/24701394.2018.1455189>  
505
- 506 Zielezinski A, Girgis HZ, Bernard G, Leimeister CA, Tang K, Dencker T, Lau AK, Röhling S,  
507 Choi JJ, Waterman MS, Comin M (2019) Benchmarking of alignment-free sequence

508 comparison methods. *Genome Biology* 20(1):144. DOI: <https://doi.org/10.1186/s13059->  
509 019-1755-7  
510  
511 Zinger L, Bonin A, Alsos IG, Bálint M, Bik H, Boyer F, Chariton AA, Creer S, Coissac E,  
512 Deagle BE, De Barba M (2019) DNA metabarcoding—Need for robust experimental  
513 designs to draw sound ecological conclusions. *Molecular Ecology* 28(8):1857-62. DOI:  
514 <https://doi.org/10.1111/mec.15060>  
515

516 **Supplementary Files**

517

518 **Supplementary File S1** – Training, test, and validation data sets used in model training and  
519 analysis

520

521 **Supplementary File S2** – Python script for custom grid search of hyperparameters for  
522 optimization of the neural network.

523

524 **Supplementary File S3** – The parameters utilized in the grid search for each of the five machine  
525 learning algorithms tested in the design of the Alfie package.

526

527 **Supplementary File S4** – Jupyter notebook with tutorial demonstrating how to apply the Alfie  
528 classifier in the Python programming language, and how to train custom alignment-free  
529 classifiers using the Alfie training module.

530

531 **Tables and Figures**

532

533 **Table 1.** The numbers of COI barcode sequences obtained from BOLD for each kingdom and  
534 the number of sequences retained within different data sets used in development of the Alfie  
535 package. The raw barcode counts represent the complete set of publicly available sequences for  
536 the given kingdom. The ‘Barcodes utilized’ column is the total number of sequences used in the  
537 analysis for the given kingdoms after filtering based on minimum sequence length and down  
538 sampling to decrease imbalanced representation of the different kingdoms. The breakdown of  
539 these sequences between the train, test, and validation data sets is also shown.

| <b>Kingdom</b>              | <b>Raw barcode count</b> | <b>Barcodes utilized</b> | <b>Train data set size</b> | <b>Test data set size</b> | <b>Validation data set size (see Table 2)</b> |
|-----------------------------|--------------------------|--------------------------|----------------------------|---------------------------|-----------------------------------------------|
| <b>Animal</b>               | 1,137,552                | 23,493                   | 18,189                     | 4,547                     | 757                                           |
| <b>Bacteria and Archaea</b> | 5,565                    | 5,547                    | 4,380                      | 1,095                     | 72                                            |
| <b>Fungi</b>                | 1,407                    | 1,368                    | 1,038                      | 260                       | 70                                            |
| <b>Plant</b>                | 22,638                   | 22,599                   | 18,017                     | 4,505                     | 77                                            |
| <b>Protist</b>              | 5,029                    | 5,026                    | 4,014                      | 1,003                     | 9                                             |
| <b>Total</b>                | 1,172,191                | 58,033                   | 45,638                     | 11,410                    | 985                                           |

540

541 **Table 2.** The taxonomic breakdown of the validation data set. For each kingdom, a taxonomic  
542 class with a near average number of sequences in the kingdom's whole data set was chosen for  
543 exclusion from the training set and inclusion in the validation data set. The names of the  
544 taxonomic classes and the numbers of barcode sequences withheld from training and testing for  
545 subsequent validation are shown.

| <b>Kingdom</b>              | <b>Withheld class</b>      | <b>Sequence count</b> |
|-----------------------------|----------------------------|-----------------------|
| <b>Animal</b>               | Diplopoda                  | 757                   |
| <b>Bacteria and Archaea</b> | Flavobacteria              | 72                    |
| <b>Fungi</b>                | Leotiomycetes              | 70                    |
| <b>Plant</b>                | Liliopsida                 | 77                    |
| <b>Protist</b>              | Heterotrichea and Colpodea | 9                     |

546



547 **Table 3.** The architectures of the neural networks tested in conjunction with the different  $k$ -mer  
548 feature sets. For each  $k$ -mer feature set and corresponding neural network, the average loss and  
549 accuracy scores from 5-fold cross validation on the training data are presented. Each neural  
550 network was comprised of a dense input layer (neuron number = number of unique  $k$ -mers, or  
551  $4^k$ ), five hidden layers of neurons (neuron counts for each layer given in table), and a dense  
552 output layer (neuron size equal to number of classes). The input and hidden layers utilized a  
553 rectified linear unit (relu) activation function (Agarap 2018), and the hidden layers had dropout  
554 rates of 0.3. The final output layer utilized a softmax activation function, and the models were  
555 trained using an Adam optimizer (Kingma & Ba 2014), minimizing sparse categorical cross  
556 entropy.  
557

| <b><i>K</i>-mer size</b> | <b>NN hidden layers sizes</b> | <b>Average accuracy</b> | <b>Average loss</b> |
|--------------------------|-------------------------------|-------------------------|---------------------|
| <b>1</b>                 | [4, 64, 128, 32, 16]          | 0.684                   | 0.899               |
| <b>2</b>                 | [16, 64, 128, 64, 16]         | 0.935                   | 0.216               |
| <b>3</b>                 | [64, 128, 64, 32, 16]         | 0.993                   | 0.038               |
| <b>4</b>                 | [256, 128, 64, 32, 16]        | 0.994                   | 0.033               |
| <b>5</b>                 | [1024, 512, 256, 64, 16]      | 0.995                   | 0.047               |
| <b>6</b>                 | [2080, 1040, 520, 260, 130]   | 0.997                   | 0.023               |

558

559 **Table 5.** The accuracy scores for the predictions made by the five different machine learning  
560 models (trained on 4-mer frequency features and the complete training data set). Accuracy on the  
561 test and validation data sets (Table 1) are shown.  
562

| <b>Algorithm</b>                  | <b>Test accuracy</b> | <b>Validation accuracy</b> |
|-----------------------------------|----------------------|----------------------------|
| <b>DNN</b>                        | 0.996                | 0.976                      |
| <b>Support Vector<br/>Machine</b> | 0.996                | 0.974                      |
| <b>K Nearest<br/>Neighbors</b>    | 0.997                | 0.927                      |
| <b>Random Forest</b>              | 0.983                | 0.861                      |
| <b>XGBoost</b>                    | 0.998                | 0.972                      |

563

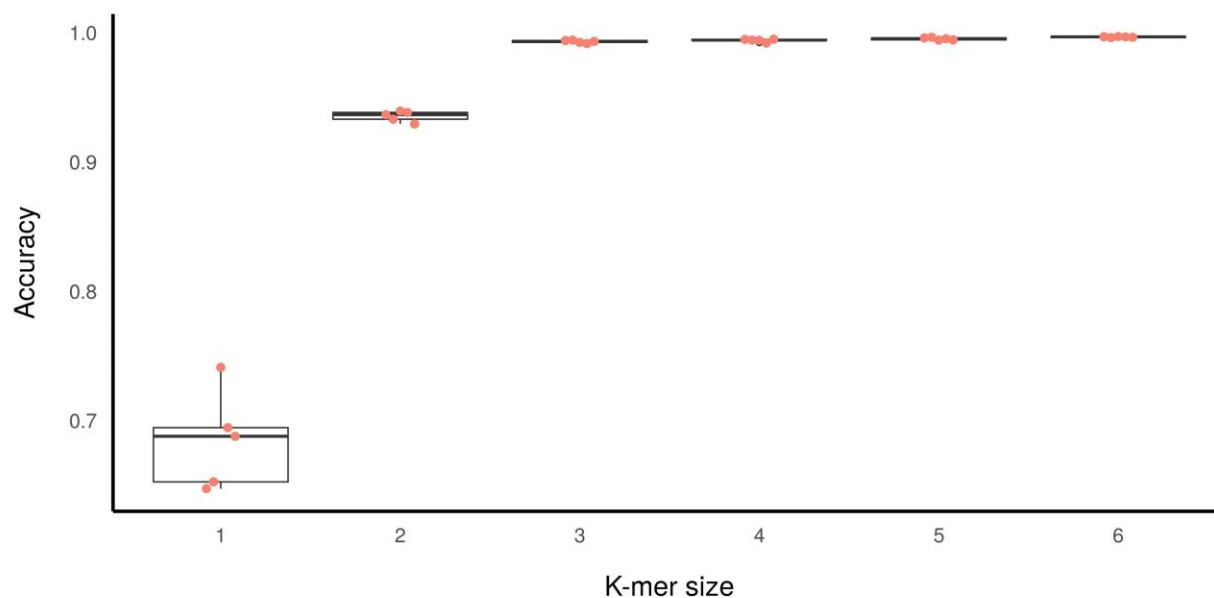

564  
565 **Figure 1.** Boxplot of the 5-fold cross validation accuracy results for the training of models of  
566 different  $k$ -mer feature sets and corresponding neural network architectures on the training data.  
567 Each dot represents an accuracy score for one of the individual fold in the cross-validation  
568 corresponding to the given  $k$ -mer feature set.  
569

570 **Acknowledgements**

571

572 Thank you to Tyler A. Elliott for assisting in the acquisition of data from the BOLD database.  
573 Thank you to Christopher A. Hempel for helpful discussions during the initial conceptualization  
574 and design of the Alfie package. Thank you to Christopher A. Hempel, Rami Baghdan, and Nora  
575 Samhadaneh for feedback on the initial draft of the manuscript.

576

577 **Funding**

578

579 Funding for this research was obtained from a grant in Bioinformatics and Computational  
580 Biology from Genome Canada through Ontario Genomics. Also, funding from the Ontario  
581 Ministry of Economic Development, Job Creation and Trade. Funders played no role in study  
582 design or decision to publish. This research was enabled in part by resources provided by  
583 Compute Canada ([www.computecanada.ca](http://www.computecanada.ca)).

584

585 **Competing Interests**

586

587 The authors have declared that no competing interests exist.

588

589 **Author Contributions**

590

591 The study was conceived and designed by CMN and SJA. Development of the Alfie package  
592 was performed by CMN. The initial draft of the manuscript was written by CMN. CMN and SJA  
593 contributed to the editing of the manuscript.
